# Supplementary material
Source: Research Square preprint supplement (doi:10.21203/rs.3.rs-10360836/v1)
Supplement: Supplementary file 1 [file 49604d6750804f21fd697835.docx]

**OECD-compliant QSAR modeling and molecular simulations reveal plant-based COX-2 inhibitors with experimentally validated anti-inflammatory activity**

Yahyea Baktiar Laskar1, 2*, Pranab Behari Mazumder1, Nachimuthu Senthil Kumar2

1. Natural Product and Biomedicine Research Laboratory, Department of Biotechnology, Assam University, Silchar 788011, Assam (India)
2. Department of Biotechnology, Mizoram University, Aizawl 796004, Mizoram (India)

**SUPPLEMENTARY TABLES**

**Table 1:** Description of the 50 compounds used for training, testing, and validation of the 2D-QSAR models.

| Database ID/Name | Ligand SMILES | IC50 (nM) | Log10 (IC50) |
| --- | --- | --- | --- |
| CHEMBL1096723 | CCSC[C@@H]1C[C@@](O)([C@H]([C@@H](O1)c1ccc(Cl)cc1)c1ccccc1)c1ccccc1 | 0.57 | -0.24 |
| CHEMBL1096724 | O[C@@]1(C[C@@H](CSC#N)O[C@H]([C@@H]1c1ccccc1)c1ccc(Cl)cc1)c1ccccc1 | 0.65 | -0.19 |
| CHEMBL1095083 | O[C@]1(C[C@@H](CSC#N)O[C@H](C1)c1ccc(Cl)cc1)c1ccccc1 | 0.90 | -0.05 |
| CHEMBL1094412 | O[C@@]1(C[C@@H](CSC#N)O[C@H]([C@@H]1c1ccccc1)c1ccccc1)c1ccccc1 | 1.55 | 0.19 |
| CHEMBL1094097 | CCSC[C@@H]1C[C@@](O)([C@H]([C@@H](O1)c1ccccc1)c1ccccc1)c1ccccc1 | 1.72 | 0.24 |
| CHEMBL1095082 | CCSC[C@@H]1C[C@](O)(C[C@@H](O1)c1ccc(Cl)cc1)c1ccccc1 | 1.82 | 0.26 |
| CHEMBL1096037 | CCSC[C@@H]1C[C@](O)(C[C@@H](O1)c1ccc(F)cc1)c1ccccc1 | 2.05 | 0.31 |
| CHEMBL1096384 | CCSC[C@@H]1C[C@](O)(C[C@@H](O1)c1ccccc1)c1ccccc1 | 2.07 | 0.32 |
| CHEMBL1096725 | CCSC[C@@H]1C[C@@](O)([C@H]([C@@H](O1)c1ccc(Br)cc1)c1ccccc1)c1ccccc1 | 2.80 | 0.45 |
| CHEMBL71833 | CCSc1cc(-c2ccccc2)c(-c2ccc(cc2)S(C)(=O)=O)c(=O)o1 | 3.20 | 0.51 |
| CHEMBL1096385 | O[C@]1(C[C@@H](CSC#N)O[C@H](C1)c1ccc(F)cc1)c1ccccc1 | 3.57 | 0.55 |
| CHEMBL1094096 | O[C@]1(C[C@@H](CSC#N)O[C@H](C1)c1ccc(Br)cc1)c1ccccc1 | 4.01 | 0.60 |
| CHEMBL1095094 | O[C@@]1(C[C@@H](CSC#N)O[C@H]([C@@H]1c1ccccc1)c1ccc(Br)cc1)c1ccccc1 | 4.03 | 0.61 |
| CHEMBL1095084 | CCSC[C@@H]1C[C@](O)(C[C@@H](O1)c1ccc(Br)cc1)c1ccccc1 | 5.49 | 0.74 |
| CHEMBL3361124 | Brc1ccc2[nH]cc(\C=C\C(=O)c3ccc(cc3)C#N)c2c1 | 9.50 | 0.98 |
| CHEMBL6 | COc1ccc2n(C(=O)c3ccc(Cl)cc3)c(C)c(CC(O)=O)c2c1 | 10 | 1.00 |
| CHEMBL1224098 | Cn1c2ccc(cc2oc1=O)-c1cc(nn1-c1ccc(Cl)cc1)C(F)(F)F | 11 | 1.04 |
| BDBM227581 | O=C1NN(C(=N\C1=C\c1cccnc1)c1cccnc1)c1ccccc1 | 14 | 1.15 |
| CHEMBL1835477 | CC(=O)Oc1cc(F)ccc1-c1cc(nn1-c1ccc(cc1)S(N)(=O)=O)C(F)(F)F | 15 | 1.18 |
| BDBM227580 | Oc1ccccc1\C=C1\N=C(N(NC1=O)c1ccccc1)c1cccnc1 | 17 | 1.23 |
| BDBM227577 | Oc1ccc(\C=C2\N=C(N(NC2=O)c2ccccc2)c2cccnc2)cc1 | 19 | 1.28 |
| CHEMBL187137 | COc1ccc(cc1)-c1cc(-c2ccccc2)c(-c2ccc(cc2)S(C)(=O)=O)c(=O)o1 | 20 | 1.30 |
| BDBM227570 | Oc1ccc(\C=C2\N=C(OC2=O)c2cccnc2)cc1 | 24 | 1.38 |
| CHEMBL184737 | COc1ccc(cc1)-c1cc(-c2cccnc2)c(-c2ccc(cc2)S(C)(=O)=O)c(=O)o1 | 30 | 1.48 |
| CHEMBL175686 | CCCCCCC(=C(c1ccccc1)c1ccccc1)c1ccc(cc1)S(=O)(=O)OC | 31 | 1.49 |
| CHEMBL360720 | CS(=O)(=O)c1ccc(cc1)C(=C\c1ccc(F)cc1)\c1ccccc1 | 32 | 1.51 |
| BDBM222445 | Clc1c(sc2ccccc12)C(=O)NN1C(=S)S\C(C1=O)=C1\C(=O)Nc2ccccc12 | 1560 | 3.19 |
| CHEMBL365497 | COc1ccc(cc1)-c1cc(-c2ccc(cc2)S(C)(=O)=O)c(-c2cccnc2)c(=O)o1 | 1600 | 3.20 |
| BDBM123807 | CN(C)c1ccc(cc1)-c1cc(nn1CC(=O)Nc1ccc(cc1)S(N)(=O)=O)-c1ccccc1 | 1680 | 3.23 |
| CHEMBL1835475 | Cc1ccc(cc1O)-c1cc(nn1-c1ccc(cc1)S(N)(=O)=O)C(F)(F)F | 1700 | 3.23 |
| BDBM222446 | O=C(NN1C(=O)CSC1=S)c1cc2ccccc2o1 | 1830 | 3.26 |
| CHEMBL9192 | C[C@]1(CCC(=O)NC1=O)N1C(=O)c2cccc(N)c2C1=O | 1850 | 3.27 |
| BDBM222441 | COc1ccc(\C=C2/SC(=S)N(NC(=O)c3sc4ccccc4c3Cl)C2=O)cc1 | 1890 | 3.28 |
| CHEMBL259401 | COc1ccc(cc1)C(=C/c1ccc(cc1)S(C)(=O)=O)\C(O)=O | 1900 | 3.28 |
| CHEMBL56367 | CS(=O)(=O)Nc1ccc(cc1Oc1ccccc1)[N+]([O-])=O | 1920 | 3.28 |
| CHEMBL2147422 | C\C=C\c1ccc2oc(cc2c1)-c1ccc(O)cc1 | 2000 | 3.30 |
| CHEMBL118 | Cc1ccc(cc1)-c1cc(nn1-c1ccc(cc1)S(N)(=O)=O)C(F)(F)F | 2050 | 3.31 |
| BDBM50106737 | CCCCc1ccc(NC=NO)c(C)c1 | 2300 | 3.36 |
| CHEMBL25 | CC(=O)Oc1ccccc1C(O)=O | 2400 | 3.38 |
| CHEMBL412610 | Cc1nn(-c2ccccc2)c2c1c(=O)oc1ccccc21 | 2630 | 3.42 |
| BDBM222448 | COc1ccc(cc1)-c1nn(cc1\C=C1/SC(=S)N(NC(=O)c2cc3ccccc3o2)C1=O)-c1ccccc1 | 2740 | 3.44 |
| CHEMBL70835 | CSc1cc(-c2ccccc2)c(-c2ccc(cc2)S(C)(=O)=O)c(=O)o1 | 2800 | 3.45 |
| ZINC27015737 | COc1ccc(NN=C(C(=O)c2ccc(Cl)cc2)C(=O)C(F)(F)F)cc1 | 2950 | 3.47 |
| CHEMBL187481 | CCC\C(=C/c1ccccc1)c1ccc(cc1)S(C)(=O)=O | 3100 | 3.49 |
| CHEMBL364663 | CC\C(=C(/c1ccccc1)c1ccc(cc1)S(C)(=O)=O)c1ccccc1 | 3200 | 3.51 |
| BDBM50035979 | NC(=S)N\N=C/c1cn(nc1-c1ccc(Cl)cc1)-c1ccccc1 | 3330 | 3.52 |
| CHEMBL4276853 | COc1ccc2cc(ccc2c1)C(C)C(=O)NN1C(=O)CCC1=O | 6990 | 3.84 |
| CHEMBL1702044 | Fc1ccc(CNC(=O)CN2C(=O)NC(C2=O)(c2ccccc2)c2ccccc2)cc1 | 7210 | 3.86 |
| CHEMBL365288 | CC\C(=C/c1ccccc1)c1ccc(cc1)S(C)(=O)=O | 8000 | 3.90 |
| CHEMBL365615 | CCCCCCC\C(=C/c1ccccc1)c1ccc(cc1)S(C)(=O)=O | 10000 | 4.00 |

**Table 2:** Description of the grid parameters used for 3D field descriptor calculation in 3D-QSAR modeling, showing the spatial dimensions, grid spacing, and probe settings used to generate steric and electrostatic field descriptors.

| **Grid Parameter** | **From** | **To** | **Interval** |
| --- | --- | --- | --- |
| **X** | -14.1834 | 17.623 | 2.0 |
| **Y** | -14.2415 | 11.4285 | 2.0 |
| **Z** | -12.9874 | 18.2037 | 2.0 |

**Table 3:** Comparison of the actual bioactivity (IC50 in nM) of the 50 known COX-2 binders with their predicted bioactivities using the best-performing 2D-QSAR models.

| **Sl.**  **No.** | **Compound ID** | **Dataset** | **Actual Bioactivity,**  **IC50 (nM)** | | **Predicted Bioactivity,**  **[Log10 (IC50)] (nM)** | |
| --- | --- | --- | --- | --- | --- | --- |
| **IC50** | **Log10 (IC50)** | **MLR** | **PLS** |
| 1 | CHEMBL1096723 | Training | 0.57 | -0.24 | 0.11 | 0.11 |
| 2 | CHEMBL1096724 | Training | 0.65 | -0.19 | -0.26 | -0.30 |
| 3 | CHEMBL1095083 | Training | 0.90 | -0.05 | 0.48 | 0.43 |
| 4 | CHEMBL1094412 | Training | 1.55 | 0.19 | -0.26 | -0.30 |
| 5 | CHEMBL1094097 | Test | 1.72 | 0.24 | 0.11 | 0.11 |
| 6 | CHEMBL1095082 | Test | 1.82 | 0.26 | 1.30 | 1.19 |
| 7 | CHEMBL1096037 | Test | 2.05 | 0.31 | 1.30 | 1.19 |
| 8 | CHEMBL1096384 | Training | 2.07 | 0.32 | 1.30 | 1.19 |
| 9 | CHEMBL1096725 | Training | 2.80 | 0.45 | 0.11 | 0.11 |
| 10 | CHEMBL71833 | Test | 3.20 | 0.51 | 2.39 | 2.39 |
| 11 | CHEMBL1096385 | Test | 3.57 | 0.55 | 0.48 | 0.43 |
| 12 | CHEMBL1094096 | Training | 4.01 | 0.60 | 0.48 | 0.43 |
| 13 | CHEMBL1095094 | Test | 4.03 | 0.61 | -0.26 | -0.30 |
| 14 | CHEMBL1095084 | Validation | 5.49 | 0.74 | 1.30 | 1.19 |
| 15 | CHEMBL3361124 | Training | 9.50 | 0.98 | 1.45 | 1.59 |
| 16 | CHEMBL6 | Training | 10 | 1.00 | 1.24 | 1.22 |
| 17 | CHEMBL1224098 | Training | 11 | 1.04 | 2.28 | 2.27 |
| 18 | BDBM227581 | Test | 14 | 1.15 | 2.96 | 3.07 |
| 19 | CHEMBL1835477 | Training | 15 | 1.18 | 1.63 | 1.68 |
| 20 | BDBM227580 | Validation | 17 | 1.23 | 3.11 | 3.18 |
| 21 | BDBM227577 | Training | 19 | 1.28 | 2.41 | 2.64 |
| 22 | CHEMBL187137 | Training | 20 | 1.30 | 1.80 | 1.93 |
| 23 | BDBM227570 | Test | 24 | 1.38 | 1.47 | 1.61 |
| 24 | CHEMBL184737 | Test | 30 | 1.48 | 1.89 | 2.00 |
| 25 | CHEMBL175686 | Training | 31 | 1.49 | 2.20 | 2.24 |
| 26 | CHEMBL360720 | Training | 32 | 1.51 | 2.38 | 2.36 |
| 27 | BDBM222445 | Training | 1560 | 3.19 | 3.10 | 3.13 |
| 28 | CHEMBL365497 | Validation | 1600 | 3.20 | 1.95 | 2.05 |
| 29 | BDBM123807 | Training | 1680 | 3.23 | 3.44 | 3.42 |
| 30 | CHEMBL1835475 | Training | 1700 | 3.23 | 2.28 | 2.27 |
| 31 | BDBM222446 | Training | 1830 | 3.26 | 3.14 | 3.21 |
| 32 | CHEMBL9192 | Training | 1850 | 3.27 | 3.95 | 3.89 |
| 33 | BDBM222441 | Training | 1890 | 3.28 | 3.09 | 3.05 |
| 34 | CHEMBL259401 | Training | 1900 | 3.28 | 2.78 | 2.70 |
| 35 | CHEMBL56367 | Training | 1920 | 3.28 | 3.70 | 3.68 |
| 36 | CHEMBL2147422 | Training | 2000 | 3.30 | 2.44 | 2.40 |
| 37 | CHEMBL118 | Training | 2050 | 3.31 | 2.28 | 2.27 |
| 38 | BDBM50106737 | Training | 2300 | 3.36 | 4.53 | 4.36 |
| 39 | CHEMBL25 | Training | 2400 | 3.38 | 2.51 | 2.45 |
| 40 | CHEMBL412610 | Validation | 2630 | 3.42 | 2.20 | 2.22 |
| 41 | BDBM222448 | Training | 2740 | 3.44 | 2.52 | 2.60 |
| 42 | CHEMBL70835 | Training | 2800 | 3.45 | 2.44 | 2.44 |
| 43 | ZINC27015737 | Training | 2950 | 3.47 | 3.04 | 3.07 |
| 44 | CHEMBL187481 | Test | 3100 | 3.49 | 2.68 | 2.62 |
| 45 | CHEMBL364663 | Validation | 3200 | 3.51 | 2.39 | 2.39 |
| 46 | BDBM50035979 | Training | 3330 | 3.52 | 2.96 | 3.07 |
| 47 | CHEMBL4276853 | Training | 6990 | 3.84 | 3.76 | 3.60 |
| 48 | CHEMBL1702044 | Training | 7210 | 3.86 | 2.96 | 3.08 |
| 49 | CHEMBL365288 | Validation | 8000 | 3.90 | 2.75 | 2.67 |
| 50 | CHEMBL365615 | Training | 10000 | 4.00 | 2.59 | 2.55 |

**Table 4:** Applicability domain (AD) analysis of the 2D-QSAR models (MLR and PLS) for COX-2 inhibitory activity prediction. The table presents the residuals, standardized residuals, leverage values, and outlier status (TRUE/FALSE) for each of the 50 compounds used in model building.

| **Sl. No.** | **MLR Model** | | | | **PLS Model** | | | |
| --- | --- | --- | --- | --- | --- | --- | --- | --- |
| Residual | Stand. Residual | Leverage | Outlier | Residual | Stand. Residual | Leverage | Outlier |
| 1 | -0.313 | -0.370 | 0.165 | FALSE | -0.348 | -0.410 | 0.125 | FALSE |
| 2 | 0.100 | 0.118 | 0.127 | FALSE | 0.120 | 0.142 | 0.103 | FALSE |
| 3 | -0.517 | -0.612 | 0.105 | FALSE | -0.474 | -0.560 | 0.073 | FALSE |
| 4 | 0.480 | 0.568 | 0.127 | FALSE | 0.500 | 0.591 | 0.103 | FALSE |
| 5 | 0.167 | 0.198 | 0.165 | FALSE | 0.132 | 0.156 | 0.125 | FALSE |
| 6 | -0.995 | -1.178 | 0.070 | FALSE | -0.933 | -1.102 | 0.026 | FALSE |
| 7 | -0.945 | -1.119 | 0.070 | FALSE | -0.883 | -1.043 | 0.026 | FALSE |
| 8 | -0.935 | -1.107 | 0.070 | FALSE | -0.873 | -1.031 | 0.026 | FALSE |
| 9 | 0.377 | 0.447 | 0.165 | FALSE | 0.342 | 0.404 | 0.125 | FALSE |
| 10 | -2.047 | -2.424 | 0.060 | FALSE | -2.041 | -2.410 | 0.038 | FALSE |
| 11 | 0.083 | 0.098 | 0.105 | FALSE | 0.126 | 0.148 | 0.073 | FALSE |
| 12 | 0.133 | 0.157 | 0.105 | FALSE | 0.176 | 0.207 | 0.073 | FALSE |
| 13 | 0.900 | 1.065 | 0.127 | FALSE | 0.920 | 1.087 | 0.103 | FALSE |
| 14 | -0.515 | -0.610 | 0.070 | FALSE | -0.453 | -0.535 | 0.026 | FALSE |
| 15 | -0.368 | -0.435 | 0.142 | FALSE | -0.445 | -0.525 | 0.047 | FALSE |
| 16 | -0.888 | -1.052 | 0.421 | TRUE | -0.835 | -0.986 | 0.186 | FALSE |
| 17 | -1.253 | -1.483 | 0.056 | FALSE | -1.229 | -1.451 | 0.015 | FALSE |
| 18 | -1.455 | -1.722 | 0.111 | FALSE | -1.534 | -1.812 | 0.020 | FALSE |
| 19 | -0.640 | -0.758 | 0.085 | FALSE | -0.644 | -0.761 | 0.063 | FALSE |
| 20 | -1.511 | -1.789 | 0.109 | FALSE | -1.567 | -1.850 | 0.028 | FALSE |
| 21 | -0.797 | -0.944 | 0.203 | FALSE | -0.969 | -1.144 | 0.002 | FALSE |
| 22 | -0.696 | -0.824 | 0.167 | FALSE | -0.787 | -0.930 | 0.079 | FALSE |
| 23 | 0.015 | 0.018 | 0.140 | FALSE | -0.059 | -0.069 | 0.046 | FALSE |
| 24 | -0.601 | -0.711 | 0.141 | FALSE | -0.678 | -0.800 | 0.071 | FALSE |
| 25 | -0.880 | -1.042 | 0.079 | FALSE | -0.906 | -1.070 | 0.049 | FALSE |
| 26 | -0.885 | -1.047 | 0.067 | FALSE | -0.843 | -0.996 | 0.015 | FALSE |
| 27 | 0.417 | 0.494 | 0.201 | FALSE | 0.364 | 0.430 | 0.138 | FALSE |
| 28 | 1.068 | 1.264 | 0.127 | FALSE | 1.000 | 1.181 | 0.067 | FALSE |
| 29 | -0.282 | -0.334 | 0.104 | FALSE | -0.276 | -0.326 | 0.039 | FALSE |
| 30 | 0.937 | 1.110 | 0.056 | FALSE | 0.961 | 1.135 | 0.015 | FALSE |
| 31 | 0.485 | 0.574 | 0.110 | FALSE | 0.435 | 0.514 | 0.031 | FALSE |
| 32 | -0.664 | -0.786 | 0.310 | FALSE | -0.633 | -0.748 | 0.173 | FALSE |
| 33 | 0.453 | 0.536 | 0.091 | FALSE | 0.458 | 0.541 | 0.070 | FALSE |
| 34 | 0.348 | 0.412 | 0.075 | FALSE | 0.420 | 0.496 | 0.025 | FALSE |
| 35 | -0.185 | -0.219 | 0.081 | FALSE | -0.178 | -0.210 | 0.051 | FALSE |
| 36 | 0.854 | 1.011 | 0.075 | FALSE | 0.905 | 1.068 | 0.015 | FALSE |
| 37 | 1.017 | 1.204 | 0.056 | FALSE | 1.041 | 1.230 | 0.015 | FALSE |
| 38 | -1.050 | -1.243 | 0.215 | FALSE | -0.942 | -1.113 | 0.126 | FALSE |
| 39 | 0.866 | 1.025 | 0.087 | FALSE | 0.928 | 1.097 | 0.015 | FALSE |
| 40 | 1.195 | 1.415 | 0.051 | FALSE | 1.207 | 1.426 | 0.016 | FALSE |
| 41 | 1.157 | 1.370 | 0.127 | FALSE | 1.068 | 1.261 | 0.057 | FALSE |
| 42 | 0.842 | 0.996 | 0.058 | FALSE | 0.857 | 1.012 | 0.035 | FALSE |
| 43 | 0.495 | 0.586 | 0.050 | FALSE | 0.471 | 0.556 | 0.021 | FALSE |
| 44 | 0.660 | 0.782 | 0.064 | FALSE | 0.714 | 0.843 | 0.027 | FALSE |
| 45 | 0.953 | 1.128 | 0.060 | FALSE | 0.959 | 1.133 | 0.038 | FALSE |
| 46 | 0.915 | 1.083 | 0.111 | FALSE | 0.836 | 0.987 | 0.020 | FALSE |
| 47 | 0.221 | 0.262 | 0.200 | FALSE | 0.300 | 0.355 | 0.140 | FALSE |
| 48 | 1.024 | 1.212 | 0.306 | FALSE | 0.927 | 1.095 | 0.148 | FALSE |
| 49 | 1.002 | 1.187 | 0.071 | FALSE | 1.068 | 1.261 | 0.025 | FALSE |
| 50 | 1.256 | 1.486 | 0.059 | FALSE | 1.294 | 1.529 | 0.030 | FALSE |

**Table 5:** Comparison of the actual bioactivity (IC50 in nM) of the 50 known COX-2 binders with their predicted bioactivities using the best-performing 3D-QSAR models.

| **Sl.**  **No.** | **Compounds** | **Dataset** | **Experimental,**  **Log10 (IC50),**  **nM** | **Predicted Bioactivity, Log10 (IC50), nM** | |
| --- | --- | --- | --- | --- | --- |
| **PCR** | **kNN** |
| 1 | CHEMBL1096723 | Training | -0.24 | -0.30 | 0.89 |
| 2 | CHEMBL1096724 | Test | -0.19 | 1.02 | 1.05 |
| 3 | CHEMBL1095083 | Validation | -0.05 | 1.68 | 0.86 |
| 4 | CHEMBL1094412 | Validation | 0.19 | 1.55 | 1.05 |
| 5 | CHEMBL1094097 | Test | 0.24 | 0.39 | 0.34 |
| 6 | CHEMBL1095082 | Test | 0.26 | 1.12 | 0.63 |
| 7 | CHEMBL1096037 | Validation | 0.31 | 1.13 | 0.89 |
| 8 | CHEMBL1096384 | Training | 0.32 | 0.20 | 0.75 |
| 9 | CHEMBL1096725 | Validation | 0.45 | -0.29 | 0.32 |
| 10 | CHEMBL71833 | Training | 0.51 | 0.16 | 0.89 |
| 11 | CHEMBL1096385 | Training | 0.55 | 1.69 | 1.28 |
| 12 | CHEMBL1094096 | Test | 0.60 | 1.67 | 0.86 |
| 13 | CHEMBL1095094 | Training | 0.61 | 1.02 | 2.48 |
| 14 | CHEMBL1095084 | Training | 0.74 | 1.13 | 0.78 |
| 15 | CHEMBL3361124 | Training | 0.98 | 1.74 | 0.78 |
| 16 | CHEMBL6 | Training | 1.00 | 1.65 | 2.29 |
| 17 | CHEMBL1224098 | Training | 1.04 | 0.97 | 0.63 |
| 18 | BDBM227581 | Validation | 1.15 | 3.90 | 1.07 |
| 19 | CHEMBL1835477 | Training | 1.18 | 2.36 | 0.97 |
| 20 | BDBM227580 | Training | 1.23 | 2.43 | 2.11 |
| 21 | BDBM227577 | Test | 1.28 | 2.95 | 3.25 |
| 22 | CHEMBL187137 | Training | 1.30 | 2.25 | 2.14 |
| 23 | BDBM227570 | Training | 1.38 | 3.16 | 2.35 |
| 24 | CHEMBL184737 | Test | 1.48 | 2.11 | 3.24 |
| 25 | CHEMBL175686 | Training | 1.49 | 2.62 | 1.96 |
| 26 | CHEMBL360720 | Training | 1.51 | 2.44 | 1.92 |
| 27 | BDBM222445 | Training | 3.19 | 3.05 | 3.34 |
| 28 | CHEMBL365497 | Training | 3.20 | 3.20 | 2.14 |
| 29 | BDBM123807 | Training | 3.23 | 2.01 | 3.32 |
| 30 | CHEMBL1835475 | Validation | 3.23 | 2.55 | 3.28 |
| 31 | BDBM222446 | Training | 3.26 | 3.71 | 3.68 |
| 32 | CHEMBL9192 | Training | 3.27 | 2.67 | 3.26 |
| 33 | BDBM222441 | Training | 3.28 | 2.68 | 2.60 |
| 34 | CHEMBL259401 | Training | 3.28 | 2.52 | 2.10 |
| 35 | CHEMBL56367 | Training | 3.28 | 2.81 | 2.23 |
| 36 | CHEMBL2147422 | Training | 3.30 | 3.04 | 3.38 |
| 37 | CHEMBL118 | Test | 3.31 | 2.46 | 3.28 |
| 38 | BDBM50106737 | Training | 3.36 | 3.21 | 3.38 |
| 39 | CHEMBL25 | Test | 3.38 | 3.04 | 3.56 |
| 40 | CHEMBL412610 | Test | 3.42 | 2.84 | 2.36 |
| 41 | BDBM222448 | Training | 3.44 | 1.80 | 3.21 |
| 42 | CHEMBL70835 | Training | 3.45 | 2.77 | 2.25 |
| 43 | ZINC27015737 | Training | 3.47 | 3.20 | 3.56 |
| 44 | CHEMBL187481 | Training | 3.49 | 3.02 | 3.31 |
| 45 | CHEMBL364663 | Training | 3.51 | 2.57 | 3.59 |
| 46 | BDBM50035979 | Training | 3.52 | 2.51 | 2.62 |
| 47 | CHEMBL4276853 | Training | 3.84 | 3.99 | 3.24 |
| 48 | CHEMBL1702044 | Training | 3.86 | 3.10 | 3.39 |
| 49 | CHEMBL365288 | Training | 3.90 | 3.40 | 3.40 |
| 50 | CHEMBL365615 | Training | 4.00 | 4.39 | 3.50 |

**Table 6:** Applicability domain (AD) analysis of the 3D-QSAR models (PCR and kNN) for COX-2 inhibitory activity prediction. The table presents the residuals, standardized residuals, leverage values, and outlier status (TRUE/FALSE) for each of the 50 compounds used in model building.

| Sl. No. | **PCR Model** | | | | **kNN Model** | | | |
| --- | --- | --- | --- | --- | --- | --- | --- | --- |
| Residuals | Std. Residuals | Leverage | Outlier | Residuals | Std. Residuals | Leverage | Outlier |
| 1 | -0.538 | -0.539 | 0.141 | FALSE | -0.345 | -0.442 | 0.089 | FALSE |
| 2 | -0.694 | -0.696 | 0.117 | FALSE | -0.400 | -0.513 | 0.028 | FALSE |
| 3 | -1.024 | -1.026 | 0.075 | FALSE | -0.300 | -0.385 | 0.053 | FALSE |
| 4 | -0.728 | -0.730 | 0.051 | FALSE | -1.500 | -1.923 | 0.028 | FALSE |
| 5 | -1.112 | -1.114 | 0.091 | FALSE | 0.240 | 0.308 | 0.089 | FALSE |
| 6 | -0.719 | -0.720 | 0.096 | FALSE | -0.025 | -0.032 | 0.089 | FALSE |
| 7 | -0.699 | -0.700 | 0.109 | FALSE | 0.025 | 0.032 | 0.089 | FALSE |
| 8 | -0.697 | -0.698 | 0.273 | TRUE | -1.550 | -1.987 | 0.029 | FALSE |
| 9 | 0.157 | 0.157 | 0.143 | FALSE | 0.095 | 0.122 | 0.089 | FALSE |
| 10 | -0.976 | -0.978 | 0.216 | FALSE | 0.135 | 0.173 | 0.089 | FALSE |
| 11 | -0.431 | -0.432 | 0.074 | FALSE | 0.300 | 0.385 | 0.053 | FALSE |
| 12 | -0.368 | -0.369 | 0.076 | FALSE | 0.350 | 0.449 | 0.053 | FALSE |
| 13 | 0.108 | 0.108 | 0.117 | FALSE | 0.400 | 0.513 | 0.028 | FALSE |
| 14 | -0.230 | -0.230 | 0.093 | FALSE | 0.455 | 0.583 | 0.089 | FALSE |
| 15 | -0.837 | -0.838 | 0.050 | FALSE | -0.150 | -0.192 | 0.029 | FALSE |
| 16 | -0.626 | -0.627 | 0.183 | FALSE | -1.140 | -1.462 | 0.125 | FALSE |
| 17 | 0.039 | 0.039 | 0.066 | FALSE | 0.390 | 0.500 | 0.090 | FALSE |
| 18 | -2.828 | -2.833 | 0.115 | FALSE | -1.040 | -1.333 | 0.028 | FALSE |
| 19 | -1.093 | -1.095 | 0.048 | FALSE | -1.045 | -1.340 | 0.055 | FALSE |
| 20 | -1.942 | -1.945 | 0.050 | FALSE | 0.040 | 0.051 | 0.028 | FALSE |
| 21 | -1.226 | -1.229 | 0.025 | FALSE | 0.150 | 0.192 | 0.029 | FALSE |
| 22 | -0.056 | -0.056 | 0.033 | FALSE | -0.990 | -1.269 | 0.103 | FALSE |
| 23 | -1.460 | -1.463 | 0.035 | FALSE | -0.950 | -1.218 | 0.055 | FALSE |
| 24 | 0.357 | 0.357 | 0.040 | FALSE | -0.860 | -1.103 | 0.131 | FALSE |
| 25 | -0.556 | -0.557 | 0.026 | FALSE | -0.935 | -1.199 | 0.995 | TRUE |
| 26 | -0.829 | -0.830 | 0.023 | FALSE | 0.265 | 0.340 | 0.029 | FALSE |
| 27 | -0.273 | -0.274 | 0.069 | FALSE | 1.500 | 1.923 | 0.028 | FALSE |
| 28 | 0.385 | 0.386 | 0.046 | FALSE | 0.860 | 1.103 | 0.139 | FALSE |
| 29 | 1.202 | 1.204 | 0.022 | FALSE | 0.975 | 1.250 | 0.029 | FALSE |
| 30 | 0.476 | 0.477 | 0.047 | FALSE | 1.040 | 1.333 | 0.028 | FALSE |
| 31 | 0.210 | 0.210 | 0.056 | FALSE | -0.005 | -0.006 | 0.055 | FALSE |
| 32 | 1.275 | 1.278 | 0.021 | FALSE | -0.110 | -0.141 | 0.055 | FALSE |
| 33 | 1.266 | 1.269 | 0.026 | FALSE | 0.990 | 1.269 | 0.081 | FALSE |
| 34 | 1.837 | 1.840 | 0.037 | FALSE | 0.900 | 1.154 | 0.131 | FALSE |
| 35 | 0.114 | 0.114 | 0.070 | FALSE | -0.120 | -0.154 | 0.055 | FALSE |
| 36 | 0.673 | 0.675 | 0.029 | FALSE | -0.005 | -0.006 | 0.054 | FALSE |
| 37 | 0.881 | 0.883 | 0.043 | FALSE | 0.005 | 0.006 | 0.054 | FALSE |
| 38 | 0.333 | 0.333 | 0.042 | FALSE | 1.705 | 2.186 | 0.053 | FALSE |
| 39 | 0.384 | 0.385 | 0.042 | FALSE | 1.100 | 1.410 | 0.055 | FALSE |
| 40 | 1.348 | 1.350 | 0.030 | FALSE | 1.550 | 1.987 | 0.029 | FALSE |
| 41 | 2.431 | 2.436 | 0.043 | FALSE | 1.415 | 1.814 | 0.028 | FALSE |
| 42 | 1.307 | 1.310 | 0.330 | TRUE | 1.075 | 1.378 | 0.143 | FALSE |
| 43 | 0.757 | 0.759 | 0.031 | FALSE | -0.185 | -0.237 | 0.966 | TRUE |
| 44 | 1.004 | 1.006 | 0.026 | FALSE | 0.110 | 0.141 | 0.055 | FALSE |
| 45 | 0.388 | 0.389 | 0.134 | FALSE | -0.195 | -0.250 | 0.051 | FALSE |
| 46 | 1.083 | 1.085 | 0.039 | FALSE | 0.120 | 0.154 | 0.055 | FALSE |
| 47 | -0.179 | -0.180 | 0.110 | FALSE | 1.180 | 1.513 | 0.116 | FALSE |
| 48 | 1.312 | 1.314 | 0.028 | FALSE | 0.460 | 0.590 | 0.055 | FALSE |
| 49 | 0.175 | 0.175 | 0.086 | FALSE | 0.195 | 0.250 | 0.059 | FALSE |
| 50 | 0.620 | 0.621 | 0.225 | FALSE | 0.245 | 0.314 | 0.036 | FALSE |

**Table 7:** Description of the 54 phytochemicals collected from different literature and chemical databases, and screened using the newly developed 2D- and 3D-QSAR models to find a promising COX-2 binder for further analysis.

| **Database ID** | **Compounds** | **Identifier used in this study** |
| --- | --- | --- |
|  | 3, 4-Difluorobenzylidene curcumin | C1 |
|  | 4', 5-DI-N-Propoxy-7-gem-difluoromethylenated genistein | C2 |
|  | 4', 5-Di-O-acetyl Genistein | C3 |
|  | 4', 7-DI-Gem-difluoromethylenated genistein | C4 |
|  | 4-(4-Hydroxybenzylidene) curcumin | C5 |
|  | 5'-Prenyl-glabridin | C6 |
|  | 6, 8-Di-DMA-chrysin | C7 |
|  | 6, 8-dibenzyl-chrysin | C8 |
|  | 6-isopropyl-chrysin | C9 |
|  | Apigenin 7, 4'-dimethyl ether | C10 |
|  | Apigenin 7-sulfate | C11 |
|  | Apigenin-7-olate | C12 |
|  | Apigenin | C13 |
|  | Chrysin-7-O-beta-D-glucoronide | C14 |
|  | Chrysine A | C15 |
|  | Chrysine B | C16 |
|  | Chrysin | C17 |
|  | Curcumin 5-8 | C18 |
|  | Curcumin pyrazole | C19 |
|  | Curcumin sulfate | C20 |
|  | Curcumin-d6 | C21 |
|  | Curcumin | C22 |
|  | Didemethyl Curcumin | C23 |
|  | Difluorinated Curcumin | C24 |
|  | Epigallocatechin Gallate | C25 |
|  | Fisetin 3-glucoside | C26 |
|  | Fisetin 3-methyl ether | C27 |
|  | Fisetin | C28 |
|  | Genistein 7-sulfate | C29 |
|  | Genistein-d4 | C30 |
|  | Genistein | C31 |
|  | Glabridin dimethyl ether | C32 |
|  | Glabridin | C33 |
|  | Hydroxytyrosol 3'-sulfate | C34 |
|  | Hydroxytyrosol Acetate | C35 |
|  | Hydroxytyrosol Decanoate | C36 |
|  | Hydroxytyrosol | C37 |
|  | Isomangiferin | C38 |
|  | Mono-Propargyl Curcumin | C39 |
|  | Monoglycinoyl curcumin | C40 |
|  | Morusin | C41 |
|  | N-(3-Nitrophenylpyrazole) Curcumin | C42 |
|  | Naringenin | C43 |
|  | O7-Nitrooxyethyl chrysin | C44 |
|  | Olmelin | C45 |
|  | Quercetin 3-sulfate | C46 |
|  | Quercetin | C47 |
|  | Racemosic acid | C48 |
|  | Resveratrol Hexanoic Acid | C49 |
|  | Resveratrol-3-O-sulfate | C50 |
|  | Resveratrol | C51 |
|  | Tetrahydro Curcumin-d6 | C52 |
|  | Trihydroxychalcone | C53 |
|  | [18FP]-curcumin | C54 |

**Table 8:** The predicted COX-2 inhibitory potential, expressed as Log10(IC50) in nM, of the additional 34 plant-derived phytocompounds using 2D-QSAR models, which were not considered for further study.

| **Identifier** | **Compounds** | **Influential Molecular Descriptors** | | | | | **MLR**  **Prediction** | **PLS**  **Prediction** |
| --- | --- | --- | --- | --- | --- | --- | --- | --- |
| **SsssCHcount** | **SssNHcount** | **T_N_O_5** | **SsCH3count** | **T_2_C_6** |
| C2 | 4', 5-DI-N-Propoxy-7-gem-difluoromethylenated genistein | 1 | 0 | 0 | 2 | 35 | **2.17** | **2.06** |
| C3 | 4', 5-Di-O-acetyl Genistein | 0 | 0 | 0 | 2 | 34 | **2.57** | **2.53** |
| C4 | 4', 7-DI-Gem-difluoromethylenated genistein | 2 | 0 | 0 | 0 | 24 | **0.75** | **0.74** |
| C9 | 6-isopropyl-chrysin | 1 | 0 | 0 | 2 | 29 | **2.28** | **2.15** |
| C12 | Apigenin-7-olate | 0 | 0 | 0 | 0 | 24 | **1.52** | **1.65** |
| C13 | Apigenin | 0 | 0 | 0 | 0 | 24 | **1.52** | **1.65** |
| C15 | Chrysine A | 0 | 0 | 0 | 4 | 39 | **3.71** | **3.49** |
| C16 | Chrysine B | 0 | 0 | 0 | 4 | 42 | **3.65** | **3.45** |
| C17 | Chrysin | 0 | 0 | 0 | 0 | 24 | **1.52** | **1.65** |
| C18 | Curcumin 5-8 | 1 | 1 | 1 | 3 | 34 | **3.83** | **3.60** |
| C19 | Curcumin pyrazole | 0 | 0 | 0 | 2 | 32 | **2.60** | **2.56** |
| C21 | Curcumin-d6 | 0 | 0 | 0 | 2 | 30 | **2.64** | **2.59** |
| C22 | Curcumin | 0 | 0 | 0 | 2 | 30 | **2.64** | **2.59** |
| C23 | Didemethyl Curcumin | 0 | 0 | 0 | 0 | 28 | **1.45** | **1.59** |
| C28 | Fisetin | 0 | 0 | 0 | 0 | 24 | **1.52** | **1.65** |
| C29 | Genistein 7-sulfate | 0 | 0 | 0 | 0 | 25 | **1.50** | **1.63** |
| C30 | Genistein-d4 | 0 | 0 | 0 | 0 | 21 | **1.57** | **1.69** |
| C34 | Hydroxytyrosol 3'-sulfate | 0 | 0 | 0 | 0 | 5 | **1.86** | **1.91** |
| C35 | Hydroxytyrosol Acetate | 0 | 0 | 0 | 1 | 8 | **2.42** | **2.38** |
| C39 | Mono-Propargyl Curcumin | 1 | 0 | 0 | 2 | 38 | **2.11** | **2.02** |
| C40 | Monoglycinoyl curcumin | 0 | 0 | 0 | 2 | 35 | **2.55** | **2.52** |
| C41 | Morusin | 0 | 0 | 0 | 4 | 62 | **3.30** | **3.17** |
| C42 | N-(3-Nitrophenylpyrazole) Curcumin | 0 | 0 | 2 | 2 | 64 | **1.21** | **1.28** |
| C43 | Naringenin | 1 | 0 | 0 | 0 | 24 | **1.14** | **1.19** |
| C44 | O7-Nitrooxyethyl chrysin | 0 | 0 | 0 | 0 | 30 | **1.41** | **1.56** |
| C45 | Olmelin | 0 | 0 | 0 | 1 | 22 | **2.17** | **2.19** |
| C46 | Quercetin 3-sulfate | 0 | 0 | 0 | 0 | 36 | **1.30** | **1.48** |
| C47 | Quercetin | 0 | 0 | 0 | 0 | 24 | **1.52** | **1.65** |
| C49 | Resveratrol Hexanoic Acid | 0 | 0 | 0 | 0 | 28 | **1.45** | **1.59** |
| C50 | Resveratrol-3-O-sulfate | 0 | 0 | 0 | 0 | 25 | **1.50** | **1.63** |
| C51 | Resveratrol | 0 | 0 | 0 | 0 | 20 | **1.59** | **1.70** |
| C52 | Tetrahydro Curcumin-d6 | 0 | 0 | 0 | 2 | 24 | **2.75** | **2.67** |
| C53 | Trihydroxychalcone | 0 | 0 | 0 | 0 | 22 | **1.55** | **1.67** |
| C54 | [18FP]-curcumin | 0 | 0 | 0 | 2 | 35 | **2.55** | **2.52** |

**Table 9:** The predicted COX-2 inhibitory potential, expressed as Log10(IC50) in nM, of the additional 34 plant-derived phytocompounds using 3D-QSAR models, which were not considered for further study.

| **Compounds/**  **Identifier** | **3D Field Descriptors** | | | | **kNN Prediction** | **3D Field Descriptors** | | | | **PCR Prediction** |
| --- | --- | --- | --- | --- | --- | --- | --- | --- | --- | --- |
| **S659** | **S1369** | **S2747** | **S2825** | **S884** | **E1977** | **E2605** | **E951** |
| C2 | -0.0007 | -0.2202 | -0.0033 | 30.0000 | **3.60** | -0.0031 | 4.5485 | 0.1921 | -0.1444 | **2.47** |
| C3 | -0.0006 | -0.2701 | -0.0028 | 30.0000 | **3.60** | -0.0023 | -1.0260 | 0.0175 | 0.4061 | **2.74** |
| C4 | -0.0004 | -0.2295 | -0.0032 | -0.8740 | **3.24** | -0.0017 | 0.8887 | 0.2088 | 0.0618 | **3.06** |
| C9 | -0.0004 | -0.2927 | -0.0045 | -0.7278 | **2.16** | -0.0013 | 1.0192 | 0.0605 | -0.2191 | **2.99** |
| C12 | -0.0003 | -0.1763 | -0.0042 | -0.3000 | **2.15** | -0.0010 | 0.8792 | 0.0382 | 0.3310 | **2.96** |
| C13 | -0.0003 | -0.1757 | -0.0045 | -0.3607 | **2.15** | -0.0010 | 0.1790 | 0.0329 | 0.1732 | **3.02** |
| C15 | -0.0005 | -0.2214 | -0.0041 | 11.2645 | **3.55** | -0.0016 | 10.0000 | 0.1414 | 0.5513 | **2.31** |
| C16 | -0.0004 | -0.2390 | -0.0055 | 30.0000 | **3.59** | -0.0013 | 8.9851 | -0.0895 | 0.0610 | **2.16** |
| C17 | -0.0003 | -0.1683 | -0.0038 | -0.3028 | **2.15** | -0.0010 | -0.1684 | 0.0261 | 0.1326 | **3.04** |
| C18 | -0.0006 | -0.1743 | -0.0024 | 30.0000 | **3.60** | -0.0029 | 0.6465 | 0.1236 | 0.4720 | **2.61** |
| C19 | -0.0009 | -0.0486 | -0.0050 | -0.1110 | **2.26** | -0.0040 | 1.1840 | 0.1179 | 0.1802 | **2.32** |
| C21 | -0.0003 | -0.0285 | -0.0498 | -0.2838 | **2.13** | -0.0007 | 0.6435 | 0.0759 | 0.1158 | **3.13** |
| C22 | -0.0007 | -0.0508 | -0.0035 | -0.1794 | **2.26** | -0.0028 | 3.6361 | 0.1290 | 0.0875 | **2.48** |
| C23 | -0.0007 | -0.0615 | -0.0030 | -0.1577 | **2.26** | -0.0030 | 0.1564 | 0.1226 | 0.0500 | **2.68** |
| C28 | -0.0003 | -0.1647 | -0.0040 | -0.1144 | **2.15** | -0.0009 | 0.4472 | 0.0070 | 0.3235 | **2.98** |
| C29 | -0.0004 | -0.2492 | -0.0030 | -0.4490 | **3.24** | -0.0015 | 2.1935 | 0.1672 | -0.2144 | **3.00** |
| C30 | -0.0004 | -0.2531 | -0.0021 | -0.4082 | **3.24** | -0.0016 | 0.9908 | 0.0836 | 0.2365 | **2.89** |
| C34 | -0.0003 | -0.0728 | -0.0025 | -0.0615 | **2.15** | -0.0009 | 2.7214 | 0.1506 | -0.1892 | **3.09** |
| C35 | -0.0002 | -0.0897 | -0.0035 | -0.1093 | **2.15** | -0.0007 | 1.6988 | 0.0846 | -0.2969 | **3.11** |
| C39 | -0.0010 | -0.1073 | -0.0040 | 30.0000 | **3.61** | -0.0046 | 8.7216 | 0.2099 | 0.2566 | **1.77** |
| C40 | -0.0008 | -0.1172 | -0.0051 | -0.1494 | **2.26** | -0.0031 | 0.8662 | 0.1996 | 0.1663 | **2.70** |
| C41 | -0.0005 | -0.0937 | -0.0047 | 8.0188 | **3.55** | -0.0018 | 5.6683 | -0.0465 | 0.0453 | **2.34** |
| C42 | -0.0008 | -0.0549 | -0.0095 | -0.7274 | **2.26** | -0.0033 | 5.2120 | -0.0082 | 0.4572 | **2.01** |
| C43 | -0.0003 | -0.2212 | -0.0047 | 1.9620 | **2.16** | -0.0009 | 2.2249 | -0.0727 | 0.1258 | **2.76** |
| C44 | -0.0004 | -0.2358 | -0.0050 | 0.6716 | **3.24** | -0.0015 | 3.3180 | 0.0506 | -0.4754 | **2.79** |
| C45 | -0.0004 | -0.2664 | -0.0021 | -0.7187 | **3.24** | -0.0016 | -2.2652 | 0.0424 | 0.2656 | **3.05** |
| C46 | -0.0003 | -0.2312 | -0.0054 | 30.0000 | **3.59** | -0.0010 | 1.5270 | -0.0012 | 0.3549 | **2.85** |
| C47 | -0.0003 | -0.1662 | -0.0044 | -0.1672 | **2.15** | -0.0009 | 1.1234 | 0.0559 | 0.2457 | **3.00** |
| C49 | -0.0010 | -0.0697 | -0.0045 | -0.0600 | **3.33** | -0.0042 | -1.0424 | 0.1040 | 0.1234 | **2.42** |
| C50 | -0.0006 | -0.0607 | -0.0032 | -0.0776 | **2.27** | -0.0028 | 1.4460 | 0.0149 | 0.1736 | **2.46** |
| C51 | -0.0005 | -0.0929 | -0.0023 | -0.0373 | **3.24** | -0.0021 | 0.0238 | -0.0038 | 0.2920 | **2.69** |
| C52 | -0.0003 | -0.0452 | -0.0179 | -0.3841 | **2.13** | -0.0007 | 7.4214 | 0.0376 | 0.1093 | **2.60** |
| C53 | -0.0004 | -0.1329 | -0.0019 | -0.1277 | **3.24** | -0.0018 | 2.1260 | 0.1240 | -0.4083 | **2.90** |
| C54 | -0.0008 | -0.0974 | -0.0064 | -0.0884 | **2.26** | -0.0032 | -0.3882 | 0.2541 | 0.1146 | **2.84** |

**Table 10:** Predicted AMDET properties of the additional 16 QSAR-prioritized compounds, showing their predicted pharmacokinetic, drug-likeness, and medicinal chemistry parameters, along with the reference drug, celecoxib, using the SwissADME server.

| **Molecule** | **Pharmacokinetics** | | | | | | | | | | | **Druglikeness** | | | | | | **Medicinal Chemistry** | | |
| --- | --- | --- | --- | --- | --- | --- | --- | --- | --- | --- | --- | --- | --- | --- | --- | --- | --- | --- | --- | --- |
| GI absorption | BBB permeant | P-gp substrate | CYP1A2 inhibitor | CYP2C19 inhibitor | CYP2C9 inhibitor | CYP2D6 inhibitor | CYP3A4 inhibitor | CYP_2D6_inhibition | CYP_2C19_inhibition | log Kp (cm/s) | Lipinski (Pfizer) | Ghose (Amgen) | Veber (GSK) | Egan (Pharmacia) | Muegge (Bayer) | Bioavailability Score | PAINS | Brenk | Leadlikeness |
| **Celecoxib** | High | ✘ | ✘ | ✔ | ✘ | ✔ | ✘ | ✘ | ✘ | ✔ | -6.21 | 0 | 1 | 0 | 0 | 0 | 0.55 | 0 | 0 | 1 |
| **C1** | Low | ✘ | ✘ | ✘ | ✘ | ✔ | ✘ | ✔ | ✘ | ✔ | -5.48 | 0 | 3 | 0 | 1 | 1 | 0.55 | 0 | 3 | 3 |
| **C5** | High | ✘ | ✘ | ✘ | ✘ | ✔ | ✘ | ✔ | ✘ | ✔ | -5.65 | 0 | 1 | 0 | 0 | 0 | 0.55 | 0 | 3 | 3 |
| **C6** | High | ✔ | ✘ | ✘ | ✔ | ✔ | ✘ | ✔ | ✘ | ✔ | -4.56 | 0 | 0 | 0 | 0 | 1 | 0.55 | 0 | 1 | 2 |
| **C7** | High | ✘ | ✘ | ✘ | ✔ | ✘ | ✘ | ✘ | ✘ | ✔ | -3.8 | 0 | 1 | 0 | 1 | 1 | 0.55 | 0 | 1 | 2 |
| **C8** | High | ✘ | ✘ | ✘ | ✘ | ✘ | ✘ | ✘ | ✘ | ✔ | -4.08 | 0 | 2 | 0 | 1 | 1 | 0.55 | 0 | 0 | 2 |
| **C10** | High | ✔ | ✘ | ✔ | ✔ | ✔ | ✔ | ✔ | ✘ | ✔ | -5.51 | 0 | 0 | 0 | 0 | 0 | 0.55 | 0 | 0 | 1 |
| **C14** | Low | ✘ | ✔ | ✘ | ✘ | ✘ | ✘ | ✘ | ✘ | ✘ | -7.89 | 0 | 0 | 1 | 1 | 1 | 0.11 | 0 | 0 | 1 |
| **C20** | Low | ✘ | ✘ | ✘ | ✘ | ✔ | ✔ | ✘ | ✘ | ✘ | -7.18 | 0 | 0 | 1 | 1 | 0 | 0.56 | 0 | 3 | 2 |
| **C24** | High | ✘ | ✘ | ✘ | ✘ | ✔ | ✘ | ✔ | ✘ | ✔ | -5.38 | 0 | 3 | 0 | 0 | 1 | 0.55 | 0 | 3 | 3 |
| **C25** | Low | ✘ | ✘ | ✘ | ✘ | ✘ | ✘ | ✘ | ✘ | ✔ | -8.27 | 2 | 0 | 1 | 1 | 3 | 0.17 | 1 | 1 | 1 |
| **C26** | Low | ✘ | ✘ | ✘ | ✘ | ✘ | ✘ | ✘ | ✘ | ✔ | -8.92 | 2 | 0 | 1 | 1 | 3 | 0.17 | 1 | 1 | 1 |
| **C32** | High | ✔ | ✔ | ✘ | ✔ | ✔ | ✔ | ✔ | ✘ | ✔ | -5.23 | 0 | 0 | 0 | 0 | 0 | 0.55 | 0 | 0 | 2 |
| **C33** | High | ✔ | ✔ | ✔ | ✔ | ✔ | ✔ | ✔ | ✘ | ✔ | -5.52 | 0 | 0 | 0 | 0 | 0 | 0.55 | 0 | 0 | 1 |
| **C36** | High | ✔ | ✘ | ✔ | ✘ | ✘ | ✔ | ✘ | ✘ | ✔ | -5.39 | 0 | 0 | 1 | 0 | 0 | 0.55 | 1 | 1 | 2 |
| **C38** | Low | ✘ | ✘ | ✘ | ✘ | ✘ | ✘ | ✘ | ✘ | ✔ | -9.14 | 2 | 1 | 1 | 1 | 3 | 0.17 | 1 | 2 | 1 |
| **C48** | Low | ✘ | ✘ | ✘ | ✘ | ✘ | ✘ | ✘ | ✘ | ✘ | -11.3 | 3 | 2 | 1 | 1 | 4 | 0.11 | 0 | 1 | 1 |
| “✔” = Yes, “✘” =No | | | | | | | | | | | | | | | | | | | | |

**Table 11:** Additional ADMET parameters of the other less-efficient compounds predicted using the PreADMET server. HIA: human intestinal absorption (0–20% = poorly absorbed, 20–70% = moderate, 70–100% = well absorbed); Caco-2 and MDCK permeability: <4 = low, 4–70 = moderate, >70 = high permeability (nm/sec); PPB: plasma protein binding, with >90% indicating strong binding and <90% indicating weak binding; hERG: prediction of cardiac toxicity potential.

| **Compound** | **HIA (%)** | **Caco2** | **MDCK** | **PPB (%)** | **hERG Inhibition** |
| --- | --- | --- | --- | --- | --- |
| Celecoxib | 96.69 | 0.499 | 45.049 | 91.08 | Medium Risk |
| C1 | 95.56 | 27.226 | 1.483 | 97.81 | Medium Risk |
| C5 | 93.55 | 21.985 | 0.044 | 93.00 | Medium Risk |
| C6 | 94.73 | 37.539 | 0.044 | 100.00 | Medium Risk |
| C7 | 95.94 | 30.969 | 12.760 | 99.48 | Ambiguous |
| C8 | 94.97 | 25.086 | 1.110 | 98.58 | High Risk |
| C10 | 96.00 | 34.577 | 8.565 | 88.96 | Medium Risk |
| C14 | 56.45 | 7.788 | 0.131 | 79.41 | Ambiguous |
| C20 | 92.92 | 1.398 | 2.376 | 97.34 | Low Risk |
| C24 | 95.56 | 28.492 | 0.044 | 95.88 | Medium Risk |
| C25 | 20.71 | 12.042 | 0.045 | 100.00 | High Risk |
| C26 | 25.17 | 11.895 | 0.943 | 58.16 | High Risk |
| C32 | 98.39 | 44.034 | 0.047 | 94.63 | Medium Risk |
| C33 | 93.62 | 20.534 | 0.050 | 100.00 | Medium Risk |
| C36 | 92.04 | 26.577 | 71.066 | 100.00 | Low Risk |
| C38 | 10.53 | 4.932 | 0.554 | 56.44 | Ambiguous |
| C48 | 1.97 | 9.839 | 1.852 | 22.56 | Ambiguous |

**SUPPLEMENTARY FIGURES**





**Figure 1:** (**A**) Tanimoto dendrogram representing hierarchical clustering of 50 compounds based on ECFP4 fingerprints (radius = 2, 1024 bits) and Tanimoto distance (1 – similarity). (**B**) Heatmap of pairwise Tanimoto similarity values showing low structural overlap among most compound pairs. (**C**) Histogram of pairwise Tanimoto similarity scores, illustrating the distribution of structural similarity across the dataset. (**D**) Representative scaffolds identified from the QSAR compound dataset using Bemis-Murcko scaffold analysis. The two most frequently occurring core scaffolds: Scaffold 1 (7 occurrences) and Scaffold 2 (6 occurrences).





**Figure 2:** Structural validation of the COX-2 protein (PDB ID: 3LN1) prior to molecular docking and molecular dynamics simulations. **(A)** Three-dimensional structure of chain A of COX-2, highlighting the active-site region used for docking studies. **(B)** ERRAT2 analysis showing a high overall quality factor of 96.66, indicating excellent structural reliability. **(C, D)** Three-dimensional and two-dimensional Ramachandran plots demonstrate that the majority of amino acid residues occupy favored and additionally allowed regions, confirming acceptable stereochemical quality. **(E)** ProSA Z-score plot showing an overall Z-score of −8.91, consistent with experimentally determined protein structures of similar size. **(F)** ProSA residue energy profile illustrating local model quality through residue-wise energy distribution along the protein sequence. Collectively, these analyses confirm the suitability of the COX-2 structure for subsequent docking and molecular dynamics investigations.


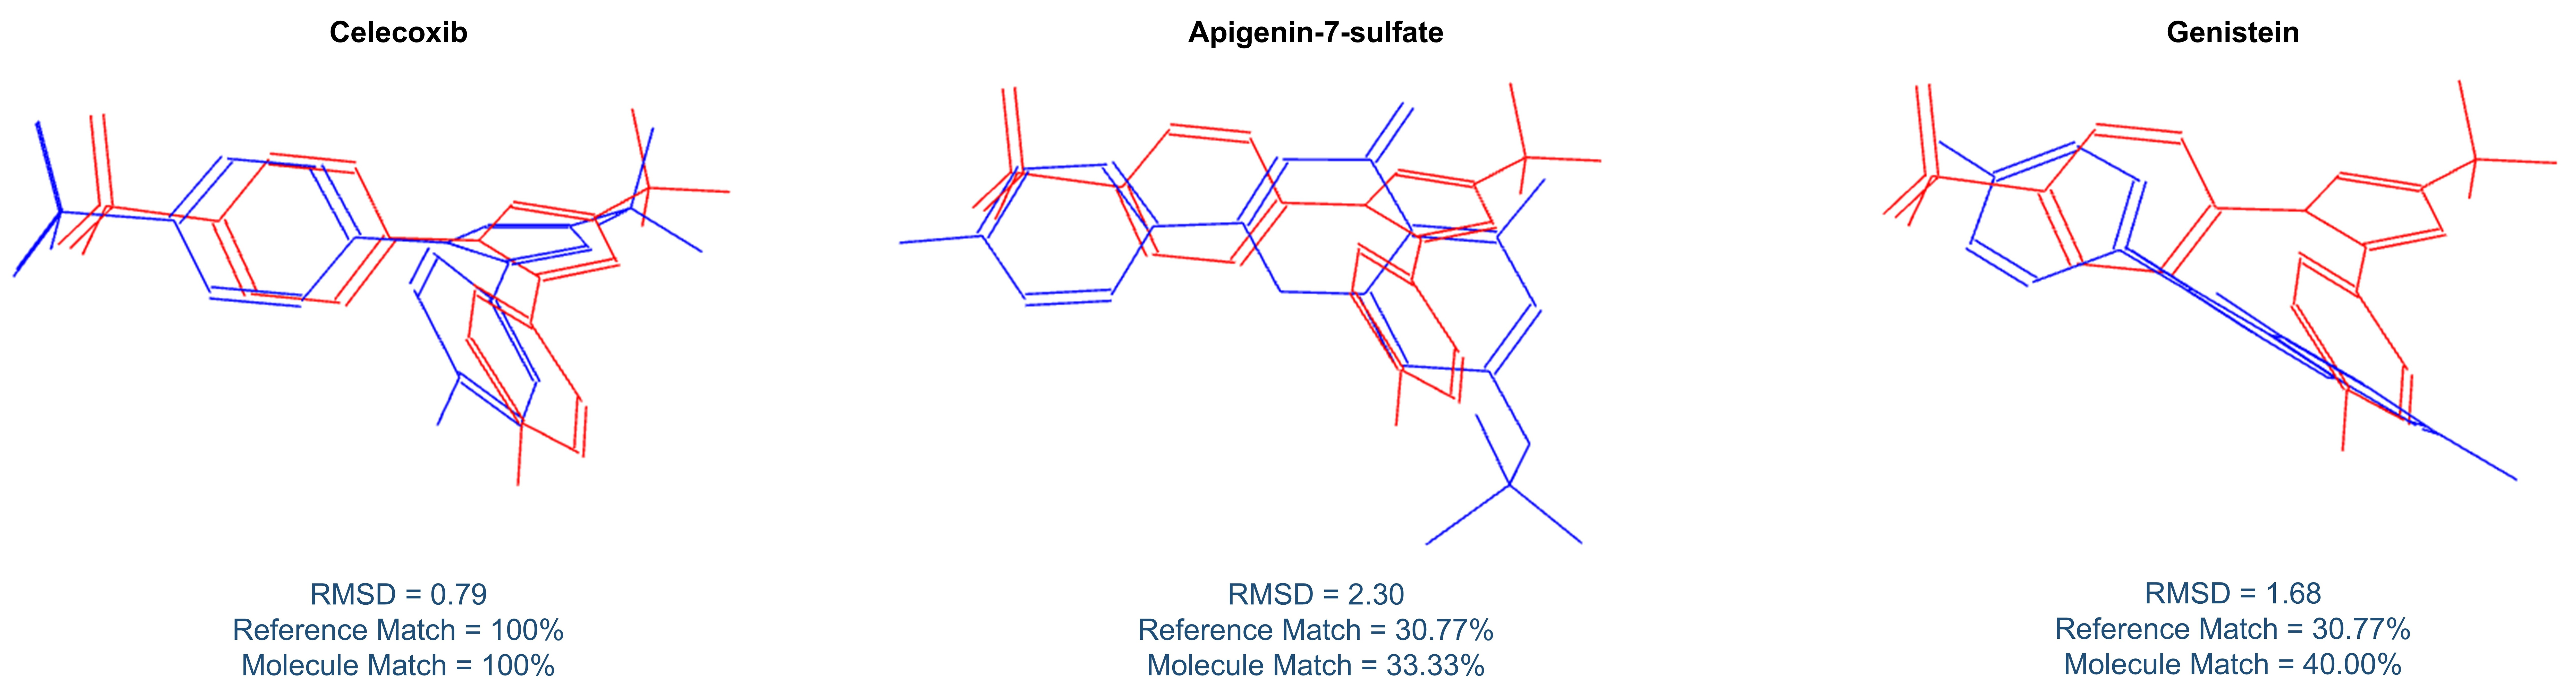


**Figure 3:** Superimposition of the best-ranked docked poses of celecoxib, apigenin-7-sulfate, and genistein with the co-crystallized ligand (celecoxib) in the COX-2 (PDB: 3LN1) active site. The root-mean-square deviation (RMSD), reference match, and molecule match values were calculated using the LigRMSD server to assess the accuracy and binding pose similarity of the docking predictions relative to the experimentally determined ligand conformation.
